# Supplementary material for: Porphyrin functionalized Co(OH)2/GO nanocomposites as an excellent peroxidase mimic for colorimetric biosensing
Source: Royal Society of Chemistry journal article supplement (doi:10.1039/c9an00945k), 2019-01-01
Supplement: c9an00945k1.pdf [file c9an00945k1.pdf]

## **Porphyrin functionalized Co(OH)<sub>2</sub>/GO nanocomposite as an excellent peroxidase mimic for colorimetric biosensing**

**Xin Zhao<sup>a</sup>, Kaili Wu<sup>a</sup>, Haoyuan Lyu<sup>a</sup>, Xianxi Zhang<sup>b</sup>, Zhenxue Liu<sup>a</sup>, Gaochao Fan<sup>c</sup>, Xiao Zhang<sup>c</sup>, Xixi Zhu<sup>a,\*</sup> and Qingyun Liu<sup>a,\*</sup>**

### **1. Steady-state kinetic study**

The steady-state kinetic assays were monitored at 652 nm with a 3 min interval in a time-scan mode. A series of experiments were carried out as follows: 200 μL H<sub>2</sub>TCPP/Co(OH)<sub>2</sub>/GO solution (0.4 mg·mL<sup>-1</sup>) in HAc-NaAc buffer solution (1.4 mL, pH 4) treated with 0.2 mL different concentration of TMB (0.05-0.25 mM) and 0.2 mL of H<sub>2</sub>O<sub>2</sub> (25 mM), or 0.2 mL different concentration of H<sub>2</sub>O<sub>2</sub> (20-100 mM) and TMB (0.1 mM) with a total reaction volume of 2 mL at room temperature. The apparent kinetic parameters were calculated according to the Line weaver-Burk plot:  $1/v = K_m/V_{max} (1/S + 1/K_m)$ , where  $v$  is the initial velocity,  $S$  represents the concentration of the substrate,  $K_m$  is the Michaelis-Menten constant, and  $V_m$  is the maximal reaction velocity <sup>1</sup>.

### **2. Colorimetric detection of glutathione**

Colorimetric detection of glutathione was established based on the excellent peroxidase-like activity of H<sub>2</sub>TCPP/Co(OH)<sub>2</sub>/GO. The mixed solution containing 1.2 mL HAc-NaAc buffer solution, 200 μL of H<sub>2</sub>O<sub>2</sub>, 200 μL of H<sub>2</sub>TCPP/Co(OH)<sub>2</sub>/GO NPs and 200 μL of TMB was incubated for 2 min at room temperature. Then, the

various concentrations of GSH were added the above mixture, the absorbance of different reaction systems was recorded. Notably, the blue color of the reaction systems started to fade gradually with the concentration of GSH increased.

**Table S1.** Peak area in O1s.

| <b>Position (eV)</b> | <b>Area</b> | <b>Affiliation</b> |
|----------------------|-------------|--------------------|
| 529.3                | 6072.924    | Co-O               |
| 530.7                | 165497.4    | Co-OH              |
| 531.6                | 35141.480   | Co-O               |

## Reference

- 1 D.-F. Chai, Z. Ma, H. Yan, Y. Qiu, H. Liu, H.-D. Guo, et al., RSC Advances, 2015, **5**, 78771-9.
